# Supplementary material for: The aberrant upregulation of exon 10-inclusive SREK1 through SRSF10 acts as an oncogenic driver in human hepatocellular carcinoma
Source: Nat Commun. 2022 Mar 16;13:1363. doi: 10.1038/s41467-022-29016-x (PMC8927159; doi:10.1038/s41467-022-29016-x)
Supplement: Supplementary file 1 — Supplementary Information [file 41467_2022_29016_MOESM1_ESM.pdf]

## **Supplementary information**

### **The aberrant upregulation of exon 10-inclusive SREK1 through SRSF10 acts as an oncogenic driver in human hepatocellular carcinoma**

Cunjie Chang<sup>1,2#</sup>, Muthukumar Rajasekaran<sup>3#</sup>, Yiting Qiao<sup>4#</sup>, Heng Dong<sup>1,2#</sup>, Yu Wang<sup>3</sup>, Hongping Xia<sup>3</sup>,  
Amudha Deivasigamani<sup>3</sup>, Minjie Wu<sup>1</sup>, Karthik Sekar<sup>3</sup>, Hengjun Gao<sup>5</sup>, Mengqing Sun<sup>1</sup>, Yuqin Niu<sup>6</sup>, Qian  
Li<sup>1</sup>, Lin Tao<sup>1,2</sup>, Zhen Yan<sup>1</sup>, Menglan Wang<sup>1</sup>, Shasha Chen<sup>7</sup>, Shujuan Zhao<sup>1,2</sup>, Dajing Chen<sup>1,2</sup>, Lina Li<sup>1</sup>,  
Fan Yang<sup>1</sup>, Haojin Gao<sup>1</sup>, Baodong Chen<sup>1</sup>, Ling Su<sup>1</sup>, Liang Xu<sup>8</sup>, Ye Chen<sup>8</sup>, Veerabrahma Pratap  
Seshachalam<sup>3</sup>, Gongxing Chen<sup>1,2</sup>, Jayantha Gunaratne<sup>9</sup>, Wanjin Hong<sup>9</sup>, Junping Shi<sup>10</sup>, Gongying Chen<sup>11</sup>,  
David S. Grierson<sup>12</sup>, Benoit Chabot<sup>12</sup>, Tian Xie<sup>1,2\*</sup>, Kam Man Hui<sup>1,3,9,13\*</sup>, Jianxiang Chen<sup>1,2,3\*</sup>

**Supplementary Table 1 Summary of the clinic pathological characteristics of the 10 HCC patients employed for the RT-PCR in Figure 1C.**

| <b>Group</b>            | <b>SREK1<sup>L</sup>/ SREK1<sup>S</sup><br/>(T/MN)&gt;2<br/>(n=5)</b> | <b>SREK1<sup>L</sup>/ SREK1<sup>S</sup><br/>(T/MN)&lt;2<br/>(n=5)</b> |
|-------------------------|-----------------------------------------------------------------------|-----------------------------------------------------------------------|
| <b>Gender</b>           |                                                                       |                                                                       |
| Male                    | 5                                                                     | 5                                                                     |
| Female                  | 0                                                                     | 0                                                                     |
| <b>Age</b>              |                                                                       |                                                                       |
| ≤60                     | 5                                                                     | 3                                                                     |
| >60                     | 0                                                                     | 2                                                                     |
| <b>AFP</b>              |                                                                       |                                                                       |
| ≤20 ng                  | 1                                                                     | 5                                                                     |
| >20ng                   | 4                                                                     | 0                                                                     |
| <b>Cirrhosis status</b> |                                                                       |                                                                       |
| Yes                     | 3                                                                     | 3                                                                     |
| No                      | 2                                                                     | 2                                                                     |
| <b>Tumor size</b>       |                                                                       |                                                                       |
| ≤5cm                    | 1                                                                     | 4                                                                     |
| >5cm                    | 4                                                                     | 1                                                                     |
| <b>TNM Stage</b>        |                                                                       |                                                                       |
| I                       | 4                                                                     | 3                                                                     |
| II & Above              | 1                                                                     | 2                                                                     |
| <b>BCLC Stage</b>       |                                                                       |                                                                       |
| A                       | 4                                                                     | 3                                                                     |
| B&C                     | 1                                                                     | 2                                                                     |

**Supplementary Table 2 Summary of clinic pathological characteristics of the 60 HCC patients employed in this study**

| Group                    | SREK1 <sup>L</sup> /SREK1 <sup>S</sup> | SREK1 <sup>L</sup> /SREK1 <sup>S</sup> |
|--------------------------|----------------------------------------|----------------------------------------|
|                          | Low (n=30)                             | High (n=30)                            |
| <b>Gender</b>            |                                        |                                        |
| Male                     | 27                                     | 26                                     |
| Female                   | 3                                      | 4                                      |
| <b>Age</b>               |                                        |                                        |
| ≤60                      | 21                                     | 24                                     |
| >60                      | 9                                      | 6                                      |
| <b>Cirrhosis status</b>  |                                        |                                        |
| Yes                      | 20                                     | 17                                     |
| No                       | 10                                     | 13                                     |
| <b>Tumor size</b>        |                                        |                                        |
| ≤5cm                     | 16                                     | 20                                     |
| >5cm                     | 14                                     | 10                                     |
| <b>AFP Level</b>         |                                        |                                        |
| ≤20 ng/ml                | 12                                     | 15                                     |
| >20 ng/ml                | 18                                     | 15                                     |
| <b>Recurrence Status</b> |                                        |                                        |
| R (≤ 2-years)            | 13                                     | 20                                     |
| NR (> 2-years)           | 16                                     | 11                                     |

**Supplementary Table 3 Clinic pathological characteristics of the 48 HCC patients employed for the SREK1<sup>L</sup> IHC assay**

|                         | IHC low expression<br>(n=27) | IHC high expression<br>(n=21) |
|-------------------------|------------------------------|-------------------------------|
| <b>Gender</b>           |                              |                               |
| Male                    | 25                           | 18                            |
| Female                  | 2                            | 3                             |
| <b>Age</b>              |                              |                               |
| ≤60                     | 23                           | 16                            |
| >60                     | 4                            | 5                             |
| <b>Tumor size</b>       |                              |                               |
| ≤5cm                    | 14                           | 8                             |
| >5cm                    | 13                           | 13                            |
| <b>Cirrhosis status</b> |                              |                               |
| Yes                     | 17                           | 17                            |
| No                      | 10                           | 4                             |
| <b>Recurrence</b>       |                              |                               |
| Yes                     | 9                            | 16                            |
| No                      | 18                           | 5                             |
| <b>TNM Stage</b>        |                              |                               |
| I                       | 20                           | 13                            |
| II                      | 3                            | 4                             |
| III A,B&C               | 4                            | 4                             |
| <b>BCLC Stage</b>       |                              |                               |
| 0 & I                   | 22                           | 16                            |
| II                      | 4                            | 3                             |
| IIIA                    | 3                            | 2                             |
| <b>HBs Antigen</b>      |                              |                               |
| Yes                     | 24                           | 17                            |
| No                      | 3                            | 4                             |

The expression was scored from 1-4 and the average scores were used for analysis. Scores  $\leq 2.0$  = low expression; scores  $> 2.0$  = high expression.

**Supplementary Table 4 Clinic pathological correlation analysis of the HCC patients with the SRSF10 gene expression.**

|                            | <b>SRSF10 low<br/>expression<br/>(n=35)</b> | <b>SRSF10 high<br/>expression<br/>(n=35)</b> | <b>x<sup>2</sup> or fisher<br/>exact test</b> | <b>P value</b> |
|----------------------------|---------------------------------------------|----------------------------------------------|-----------------------------------------------|----------------|
| <b>Gender</b>              |                                             |                                              |                                               |                |
| Male                       | 33                                          | 28                                           | 3.188                                         | 0.07           |
| Female                     | 2                                           | 7                                            |                                               |                |
| <b>Age</b>                 |                                             |                                              |                                               |                |
| <50                        | 4                                           | 10                                           | 3.214                                         | 0.07           |
| ≥50                        | 31                                          | 25                                           |                                               |                |
| <b>AFP</b>                 |                                             |                                              |                                               |                |
| Negative                   | 22                                          | 12                                           | 5.719                                         | <b>0.01</b>    |
| Positive                   | 13                                          | 23                                           |                                               |                |
| <b>Differentiation</b>     |                                             |                                              |                                               |                |
| I/II                       | 24                                          | 23                                           | 0.065                                         | 0.7            |
| III/IV                     | 11                                          | 12                                           |                                               |                |
| <b>Size</b>                |                                             |                                              |                                               |                |
| ≤5 cm                      | 21                                          | 18                                           | 0.521                                         | 0.4            |
| >5 cm                      | 14                                          | 17                                           |                                               |                |
| <b>Child-Pugh score</b>    |                                             |                                              |                                               |                |
| A                          | 26                                          | 27                                           | 0.078                                         | 0.7            |
| B                          | 9                                           | 8                                            |                                               |                |
| <b>Cirrhosis</b>           |                                             |                                              |                                               |                |
| No                         | 18                                          | 14                                           | 0.921                                         | 0.33           |
| Yes                        | 17                                          | 21                                           |                                               |                |
| <b>Venous Infiltration</b> |                                             |                                              |                                               |                |
| NA                         | 25                                          | 19                                           | 2.2                                           | 0.1            |
| VI                         | 10                                          | 16                                           |                                               |                |
| <b>Recurrence</b>          |                                             |                                              |                                               |                |
| ≤24 months                 | 17                                          | 24                                           | 2.57                                          | 0.109          |
| ≥24 months                 | 18                                          | 11                                           |                                               |                |
| <b>Status</b>              |                                             |                                              |                                               |                |
| Dead                       | 14                                          | 23                                           | 4.644                                         | <b>0.03</b>    |
| Alive                      | 21                                          | 12                                           |                                               |                |

**Supplementary Table 5 List of the antibodies used in the study.**

| Antibodies used for Western blot |                                           |            |         |               |                                               |
|----------------------------------|-------------------------------------------|------------|---------|---------------|-----------------------------------------------|
| Cat. No                          | Antibody                                  | Lot No.    | Species | dilution      | Company and description                       |
| HPA037674                        | SREK1                                     | R35896     | Rabbit  | 1/1000        | Sigma-Aldrich, for Fig. 5G, Fig. 3E (ab-2)    |
| #2118                            | GAPDH (14C10)                             | 10         | Rabbit  | 1/5000        | Cell Signaling Technology                     |
| T6199                            | $\alpha$ -Tubulin (DM1A)                  | R11234     | Mouse   | 1/5000        | Sigma-Aldrich                                 |
| sc-393594                        | UPF1                                      | L1217      | Mouse   | 1/2000        | Santa Cruz Biotechnology                      |
| sc-374557                        | SMG1                                      | K2817      | Mouse   | 1/1000        | Santa Cruz Biotechnology                      |
| sc-515722                        | MOV10                                     | H0916      | Mouse   | 1/1000        | Santa Cruz Biotechnology                      |
| sc-393905                        | RUVBL1                                    | H0217      | Mouse   | 1/1000        | Santa Cruz Biotechnology                      |
| sc-374135                        | RUVBL2                                    | K2817      | Mouse   | 1/1000        | Santa Cruz Biotechnology                      |
| sc-374230                        | UPF2                                      | H1417      | Mouse   | 1/1000        | Santa Cruz Biotechnology                      |
| sc-398821                        | UPF3                                      | G3117      | Mouse   | 1/1000        | Santa Cruz Biotechnology                      |
| sc-271405                        | MAGOH/B                                   | G0210      | Mouse   | 1/1000        | Santa Cruz Biotechnology                      |
| sc-514050                        | GNL2                                      | I1217      | Mouse   | 1/1000        | Santa Cruz Biotechnology                      |
| sc-514308                        | SEC13                                     | G2617      | Mouse   | 1/1000        | Santa Cruz Biotechnology                      |
| sc-32318                         | PABPC1                                    | L2216      | Mouse   | 1/1000        | Santa Cruz Biotechnology                      |
| HPA053805                        | SRSF10                                    | R71755     | Rabbit  | 1/1000        | Sigma-Aldrich                                 |
| LS-C133661                       | SRSF10                                    | NA         | Mouse   | 1/2000        | LSBio                                         |
| sc-33652                         | SRSF1                                     | L0413      | Rabbit  | 1/1000        | Santa Cruz Biotechnology                      |
| HPA021593                        | PECR                                      | R09325     | Mouse   | 1/1000        | Santa Cruz Biotechnology                      |
| Sc-5261                          | ELAVL1/HuR                                | NA         | Mouse   | 1/1000        | Santa Cruz Biotechnology                      |
| Sc-101137                        | SFRQ                                      | NA         | Mouse   | 1/1000        | Santa Cruz Biotechnology                      |
| HPA034829                        | SF3B6                                     | R32766     | Mouse   | 1/1000        | Sigma-Aldrich                                 |
| NA                               | SREK1 <sup>L</sup>                        | NA         | Rabbit  | 1/5000        | Customized made by Genscript (ab-1 of Fig 3E) |
| ab21679                          | CHC/CLTC                                  | GR264025-2 | Rabbit  | 1/5000        | Abcam                                         |
| ab237697                         | TXNDC5                                    | NA         | Rabbit  | 1/1000        | Abcam                                         |
| ab175205                         | BLOC1S5                                   | NA         | Rabbit  | 1/2000        | Abcam                                         |
| A305105A                         | SREK1 <sup>L</sup> and SREK1 <sup>S</sup> | 1          | Rabbit  | 1/5000        | Thermofisher                                  |
| sc-374015                        | Lamin B1                                  | J2220      | Mouse   | 1/5000        | Santa Cruz Biotechnology                      |
| Antibodies used for IP and SILAC |                                           |            |         |               |                                               |
| Cat. No                          | Antibody                                  | Lot No.    | Species | Company       | Application                                   |
| HPA037674                        | SREK1                                     | R35896     | Rabbit  | Sigma-Aldrich | IP                                            |
| A302-282A-1                      | SRSF10                                    | NA         | Rabbit  | Bethyl Bio    | IP for SILAC                                  |
| HPA053805                        | SRSF10                                    | R71755     | Rabbit  | Sigma-Aldrich | IP for SILAC                                  |

|                               |                                                                              |                |                |                               |                 |
|-------------------------------|------------------------------------------------------------------------------|----------------|----------------|-------------------------------|-----------------|
| NA                            | SREK1-E10                                                                    | NA             | Rabbit         | Customized, made by Genscript | IP              |
| I5006                         | IgG control                                                                  | NA             | Rabbit         | Sigma-Aldrich                 | IP control      |
| ab99617                       | Rat monoclonal [187.1] Secondary Antibody to Mouse kappa - light chain (HRP) | GR1190308-3    | Rat            | Abcam                         | IB, 1/5000      |
| ab99697                       | Mouse monoclonal [SB62a] Secondary Antibody to Rabbit IgG light chain (HRP)  | GR122803-1     | Mouse          | Abcam                         | IB, 1/5000      |
| <b>Antibodies used for IF</b> |                                                                              |                |                |                               |                 |
| <b>Cat. No</b>                | <b>Antibody</b>                                                              | <b>Lot No.</b> | <b>Species</b> | <b>Company</b>                | <b>Dilution</b> |
| ab89984                       | $\alpha$ -Tubulin                                                            | GR271216-4     | Chicken        | Abcam                         | 1/1000          |
| F9291                         | FLAG® BioM2/Flag-Biotin                                                      | SLBF5390V      | Mouse          | Sigma-Aldrich                 | 1/500           |
| HPA037674                     | SREK1                                                                        | R35896         | Rabbit         | Sigma-Aldrich                 | 1/200           |
| LS-C133661                    | SRSF10                                                                       | NA             | Mouse          | LSBio                         | 1/100           |
| ab5176                        | Anti-Histone H3 (phospho S10)                                                | NA             | Rabbit         | Abcam                         | 1/200           |

**Supplementary Table 6 Primers for real-time PCR.**

| <b>Primer Name</b> | <b>Sequence 5'-3'</b>  |
|--------------------|------------------------|
| <i>ACTB</i> F      | AATCTGGCACCACACCTTCTA  |
| <i>ACTB</i> R      | ATAGCACAGCCTGGATAGCAA  |
| <i>GAPDH</i> F     | ATGGGGAAGGTGAAGGTCG    |
| <i>GAPDH</i> R     | GGGGTCATTGATGGCAACAATA |
| 18S F              | GTAACCCGTTGAACCCATT    |
| 18S R              | CCATCCAATCGGTAGTAGCG   |
| SREK1 E9E10J-F     | GCATTACGGGACAAGAGAAAAG |
| SREK1 E10E11J-R    | CCTTTCCTGCTGGAACCTACGA |
| SREK1 E9-F         | GAGTAGATCCCATAATAG     |
| SREK1 E9E11J-R     | TACGCCTTTCCCGTGAAT     |
| SREK1 E9-F         | CGTTCAAGACAGAAAGACAGAC |
| SREK1 E11-R        | AACTCCTGCTCCTCCTCCTA   |
| <i>SRSF10</i> F    | CGACAATGATAGCCAAGTAAG  |
| <i>SRSF10</i> R    | TCTATGTAGCACCTTTCCTC   |
| <i>SRSF1</i> F     | GCAGGTGATGTATGTTATGC   |
| <i>SRSF1</i> R     | TCTCCCTCATGAGATCTAAAC  |
| <i>ELAVL1</i> F    | GATCAGACTACAGGTTTGTC   |
| <i>ELAVL1</i> R    | TTGAAACTGGTAATTGCCTC   |
| <i>MAGO H</i> F    | CCAAAGAGGATGATGCATTG   |
| <i>MAGO H</i> R    | CTGGATCCTTGGATTGATTG   |
| <i>POLR2D</i> F    | AAAAACAGAGAGACCATTGC   |
| <i>POLR2D</i> R    | TATCATCAAGAATCTGCTGC   |
| <i>POLR2G</i> F    | CATGTCTTGCTTCATCTCTC   |
| <i>POLR2G</i> R    | CCTCATCCATTGTCTTGTAAC  |
| <i>SFPQ</i> F      | CTTGAATCTAGAGCTTTGGC   |
| <i>SFPQ</i> R      | CACTATTACAACAGCCCTTTC  |
| <i>PABPC4</i> F    | GCACAAAAGAAAGTAGAACG   |
| <i>PABPC4</i> R    | CCTGATATCGACTAATTCTCTC |
| <i>PABPC1</i> F    | AATGAACGGTAGAATTGTGG   |
| <i>PABPC1</i> R    | GTTCTGAGTCTGTGGGATAG   |
| <i>MAGOHB</i> F    | TCAGTCAAAGGATCCTGAAG   |
| <i>MAGOHB</i> R    | CAAACAGCCTGAAAACATAC   |
| <i>PECR</i> F      | GTACCAGATCATGACAACCTG  |
| <i>PECR</i> R      | CAGAAGCATATCCTCAAGATG  |
| BLOC1S5-TXNDC5-F   | ACGAAAAAAGGTGTGGACAC   |

|                             |                         |
|-----------------------------|-------------------------|
| BLOC1S5-TXNDC5-R            | ATACAGCCCTTGCTTGAGC     |
| ABHD14A-ACY1-F              | TGACCTTCCAGCTCACCACG    |
| ABHD14A-ACY1-R              | TGGATGCTGACGCACTTCA     |
| SYS1-DBNDD2-F               | CCCTCACCTGGAGCTGACAT    |
| SYS1-DBNDD2-R1              | TCGCAAGGCAAGAACACA      |
| <i>TXNDC5</i> -F            | CGTGGTCTTCGAGAAATGCG    |
| <i>TXNDC5</i> -R            | AGGTCATTCCAAGTCGGCTG3   |
| <i>BLOC1S5</i> -F           | GCTGTGTGTTCTGACGGTG     |
| <i>BLOC1S5</i> -R           | CTGTCCCGCATTGTGTCTCTA   |
| <i>UPF1</i> -F              | ACCGACTTTACTCTTCCTAGCC  |
| <i>UPF1</i> -R              | AGGTCCTTCGTGTAATAGGTGTC |
| Mouse Srek <sup>L</sup> -F  | TCACGGGACAAGAGAAAAG     |
| Mouse Srek1 <sup>L</sup> -R | CCTTTCCCTGCTGGTACTACGA  |

## Supplementary Figures and figures Legends

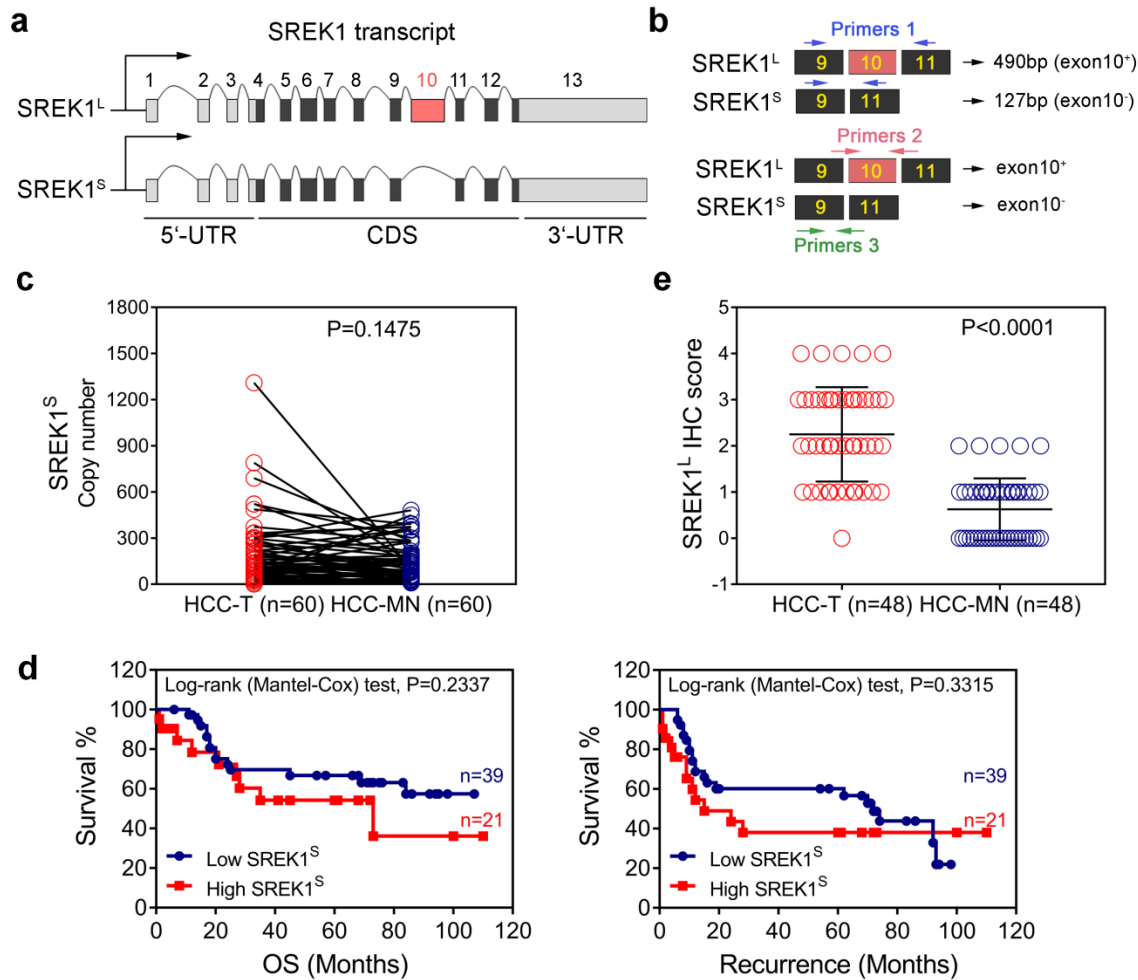

**Supplementary Fig. 1 SREK1<sup>L</sup>, but not SREK1<sup>S</sup>, is up-regulated in HCC tumors and associated with HCC prognosis.** (a) Two SREK1 variants: with (SREK1<sup>L</sup>) or without (SREK1<sup>S</sup>) exon 10. (b) Three sets of primers (primer sets 1-3) were designed to detect the two variants. (c) The real-time PCR detection of SREK1<sup>S</sup> expression in 60 pairs of HCC tissues (HCC-T: HCC tumors; HCC-MN: HCC matched adjacent histologically normal tissues). (d) The survival analysis of high and low expression of SREK1<sup>S</sup> cutoff by mean in 60 patients' tissues. (e) Summary of the results obtained from immunohistochemical staining of SREK1<sup>L</sup> by an SREK1-E10 antibody in 48 pairs HCC tissues. Data are shown as the mean  $\pm$  SD, two-tailed, paired *t* test is used for (c, e), \*\**p* < 0.01; \*\*\**p* < 0.001. Source data are provided as a Source Data file.



HCCLM3 stable knockdown cells ( $n=3$ , data are shown as the mean  $\pm$  SD; \*\*\* $p < 0.001$ ). ShScram: scramble control shRNA, shE10#1 and #2: exon 10-specific shRNAs. **(c)** The cell growth, and **(d)** Wound healing migration were analyzed in scramble- or SREK1<sup>L</sup>-knockdown cells (1% FBS was used for wound healing assay to exclude the potential growth effect on migration) ( $n=3$ , data are shown as the mean  $\pm$  SEM; \*\*\* $p < 0.001$ ). **(e)** Wound healing migration assays or **(f)** anchorage-independent soft agar colony formation assays of cells in which exon 10-specific SREK1 was stably knocked down. **(g)** PCR detection of the SREK1<sup>S</sup> expression in cells treated by three individual siRNAs targeting SREK1<sup>S</sup> ( $n=3$ , data are shown as the mean  $\pm$  SEM; \*\* $p < 0.01$ , \*\*\* $p < 0.001$ ). **(h)** Immunoblotting analysis of the SREK1<sup>L</sup> and SREK1<sup>S</sup> protein expression in the Hep3B cells treated by the siRNAs targeting SREK1<sup>S</sup> or SREK1<sup>S</sup> combined with SREK1<sup>L</sup>. **(i)** Incucyte analysis of the Hep3B cell growth after siRNA treatment ( $n=3$ , data are shown as the mean  $\pm$  SD; \*\*\* $p < 0.001$ ). **(j)** Expression of SREK1 during mouse liver development ( $n=3$ , data are shown as the mean  $\pm$  SD; \*\*\* $p < 0.001$ ). **(k)** The schedule of Adeno-associated Virus (AAV) in vivo delivery of GFP and Srek1<sup>L</sup> expression by intravenous injection, partially hepatectomy (30% removed) was performed on day 40 and the pH3S10<sup>+</sup> cells were detected on day 44, 48 and 52. **(l)** The GFP ( $n=4$ ) or Srek1<sup>L</sup> ( $n=7$ ) expression was detected by small animal imaging (left panel) or realtime PCR (right panel) (data are shown as the mean  $\pm$  SD; \* $p < 0.05$ , \*\* $p < 0.01$ ), and pH3S10<sup>+</sup> cells were detected by **(m)** immunofluorescence staining and were quantified **(n)** on the day 4<sup>th</sup> and 8<sup>th</sup> after hepatectomy ( $n=3$ , data are shown as the mean  $\pm$  SD; \*\*\* $p < 0.001$ ), scale bar = 100  $\mu$ m. **(o)** The alignment of the consensus protein sequences for SREK1 EK domain in four species and the NLS signal is labelled with an orange line. Two-tailed, unpaired  $t$  test is used for **(a-d, g, i, j, l, n)**. Source data are provided as a Source Data file. Images in Supplementary Fig. 2k provided with permission from Servier Medical Art.

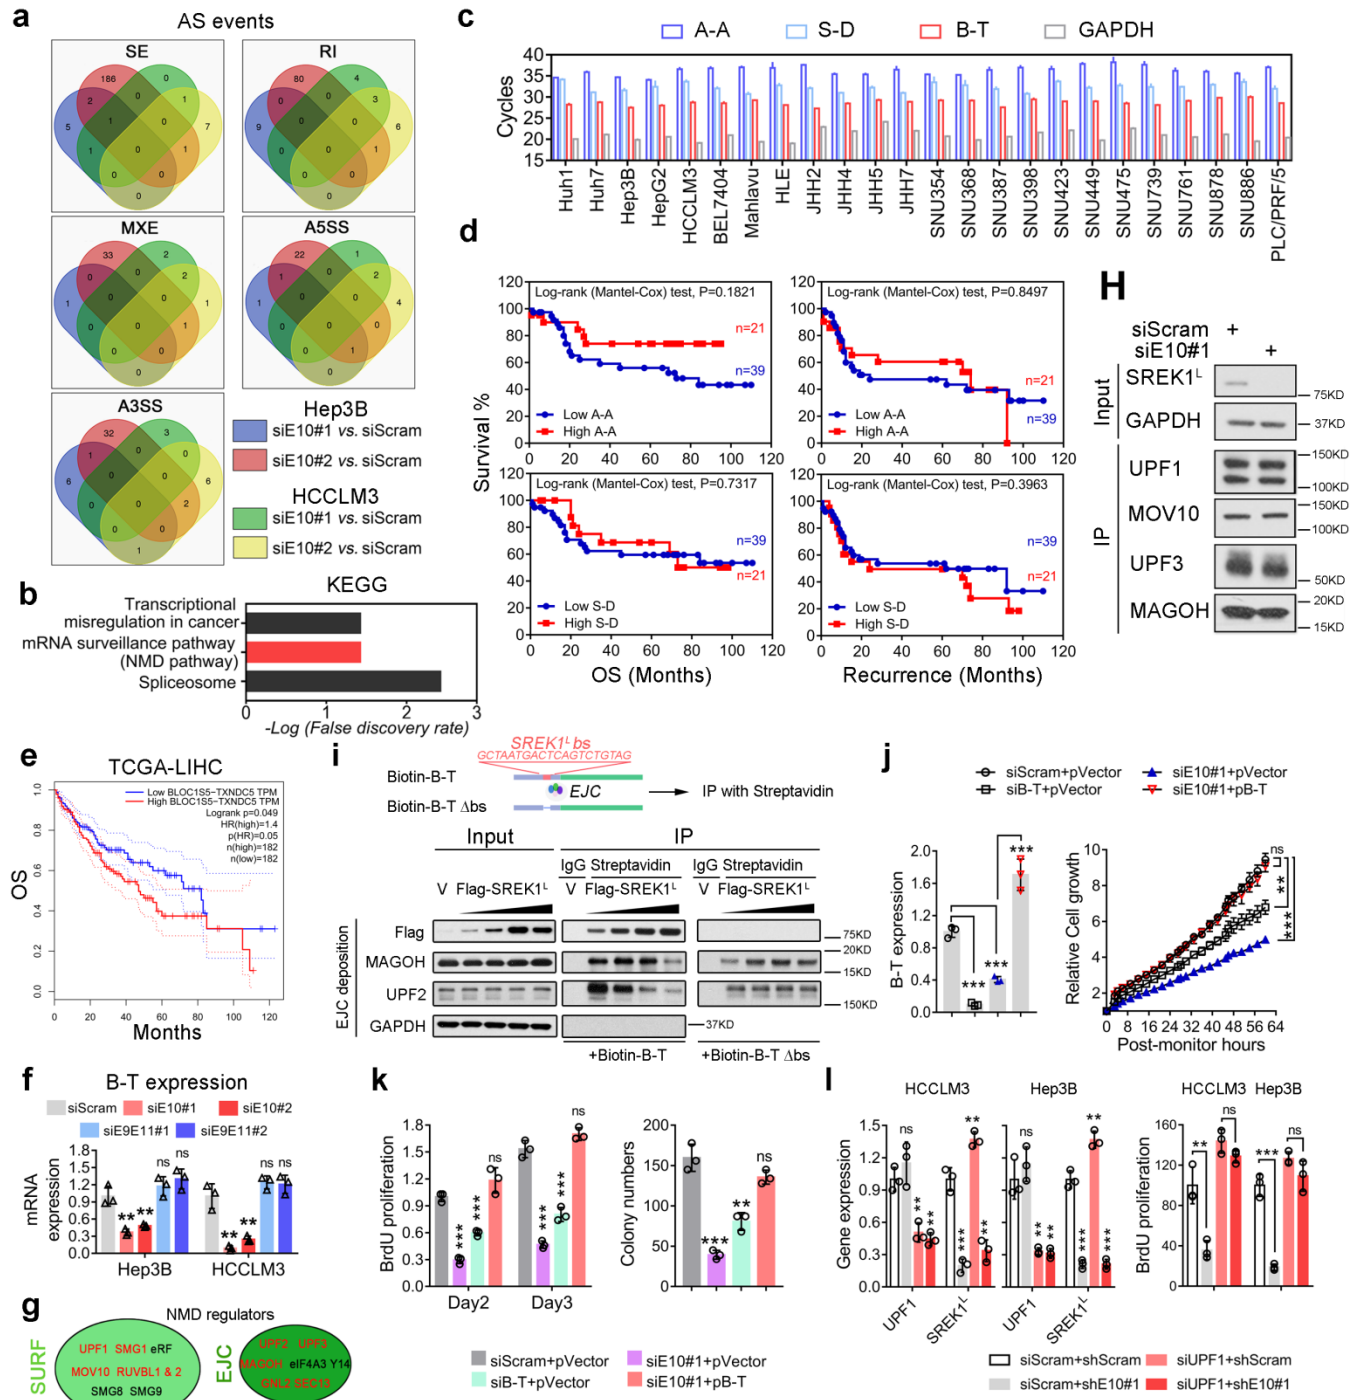

**Supplementary Fig. 3 SREK1<sup>L</sup> maintains the expression of B-T, a NMD target gene, to promote the oncogenesis of HCC cells.** (a) Venn diagram analysis of the targets regulated by the 5 common AS of SREK1<sup>L</sup> in Hep3B and HCCLM3 cells. SE: Skipped Exon, RI: Retained Intron, MXE: Mutually exclusive

Exon, A5SS: Alternative to 5'Splice Site, and A3SS: Alternative to 3'Splice Site. **(b)** The KEGG pathway enrichment by the top 100 SREK1-coexpressed genes in TCGA-LIHC database. **(c)** The analysis of the cycles for real time PCR on three NMD target genes and GAPDH expression in 24 HCC cell lines. **(d)** Comparison of the OS and Disease –free survival of high or low expression of ABHD14A-ACY1 (A-A) and SYS1-DBNDD2 (S-D) in 60 HCC patients. **(e)** The OS analysis of the high or low B-T expression in TCGA-LIHC database. **(f)** The expression of B-T in scramble (siScram)-transfected, SREK1<sup>S</sup> (siE9E11#1 or 2) or SREK1<sup>L</sup> (siE10#1 or 2)-knockdown Hep3B and HCCLM3 cells ( $n=3$ , data are shown as the mean  $\pm$  SD; \*\* $p < 0.01$ ). **(g)** The components of two reported key NMD complexes—the SURF complex and EJC; elements chosen for detection are labelled in red. **(h)** The immunoblotting analysis of the corresponding targeted protein expression in the input or immunoprecipitation for RIP assay shown in Fig. 3f-g in Hep3B cells. **(i)** Western blots show Flag-tagged SREK1<sup>L</sup> and endogenous EJC components MAGOH and UPF2 coprecipitated with biotinylated B-T or B-T  $\Delta$ BS (SREK1<sup>L</sup> binding site deleted) RNA in Hep3B nuclear extract. **(j)** Real-time PCR detection of the B-T expression ( $n=3$ , data are shown as the mean  $\pm$  SD; \*\*\* $p < 0.001$ ) and the growth curve ( $n=3$ , data are shown as the mean  $\pm$  SEM; \*\* $p < 0.01$ , \*\*\* $p < 0.001$ ) are shown for different treatment groups in Hep3B cells. **(k)** The BrdU proliferation or anchorage-independent soft agar colony formation assays were performed in scramble control, SREK1<sup>L</sup>, B-T knockdowns or SREK1<sup>L</sup> knockdown combined with B-T re-expression in Hep3B cells ( $n=3$ , data are shown as the mean  $\pm$  SD; \*\* $p < 0.01$ , \*\*\* $p < 0.001$ ). **(l)** Real-time PCR detection of the gene expression and the BrdU proliferation analysis in the Hep3B and HCCL3M cells silenced with scramble, UPF1, SREK1<sup>L</sup> or their combined siRNAs ( $n=3$ , data are shown as the mean  $\pm$  SD; \*\* $p < 0.01$ , \*\*\* $p < 0.001$ ). Two-tailed, unpaired  $t$  test is used for **(f, j, k, l)**. Source data are provided as a Source Data file.

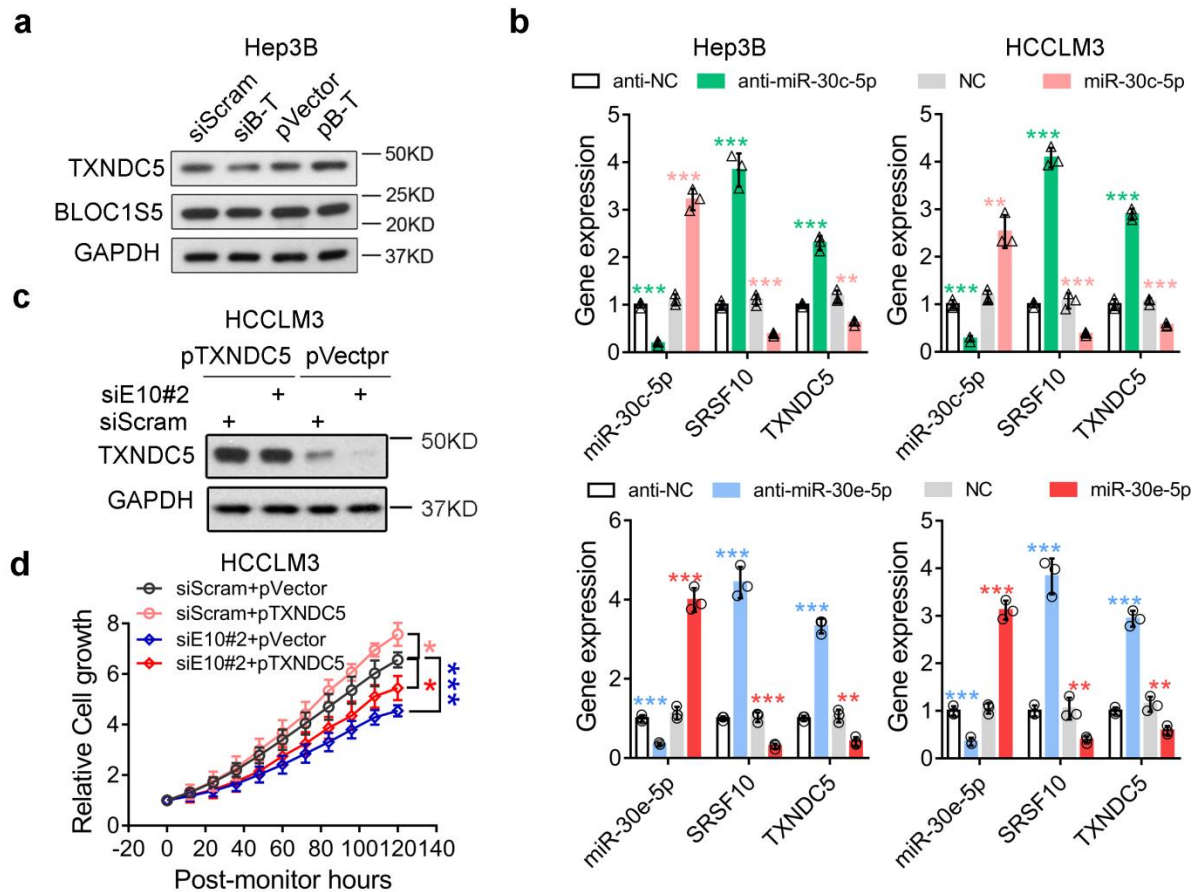

**Supplementary Fig. 4 B-T acts as a ceRNA to inhibit miR-30c-5p and miR-30e-5p and promote SRSF10 and TXNDC5 expression in HCC cells.** (a) The immunoblotting analysis of the effect of knockdown or forced expression of B-T on TXNDC5 and BLOC1S5 protein expression in Hep3B cells. (b) Realtime PCR analysis of the effect of the inhibitor or mimics of miR-30c-5p or miR-30e-5p on the endogenous expression of TXNDC5 or SRSF10 genes in Hep3B and HCCLM3 cells ( $n=3$ , data are shown as the mean  $\pm$  SD; \*\* $p < 0.01$ , \*\*\* $p < 0.001$ ). (c) Immunoblotting analysis of TXNDC5 and GAPDH expression after SREK1<sup>L</sup> or scramble control knockdown in the TXDNC5 or vector control overexpressed HCCLM3 cells. (d) Incubate cell growth assay of the TXDNC5 or vector control overexpressed HCCLM3 cells after scramble or SREK1<sup>L</sup> knockdown

treatment ( $n=3$ , data are shown as the mean  $\pm$  SEM; \* $p < 0.05$ , \*\*\* $p < 0.001$ ). Two-tailed, unpaired  $t$  test is used for (**b**, **d**). Source data are provided as a Source Data file.

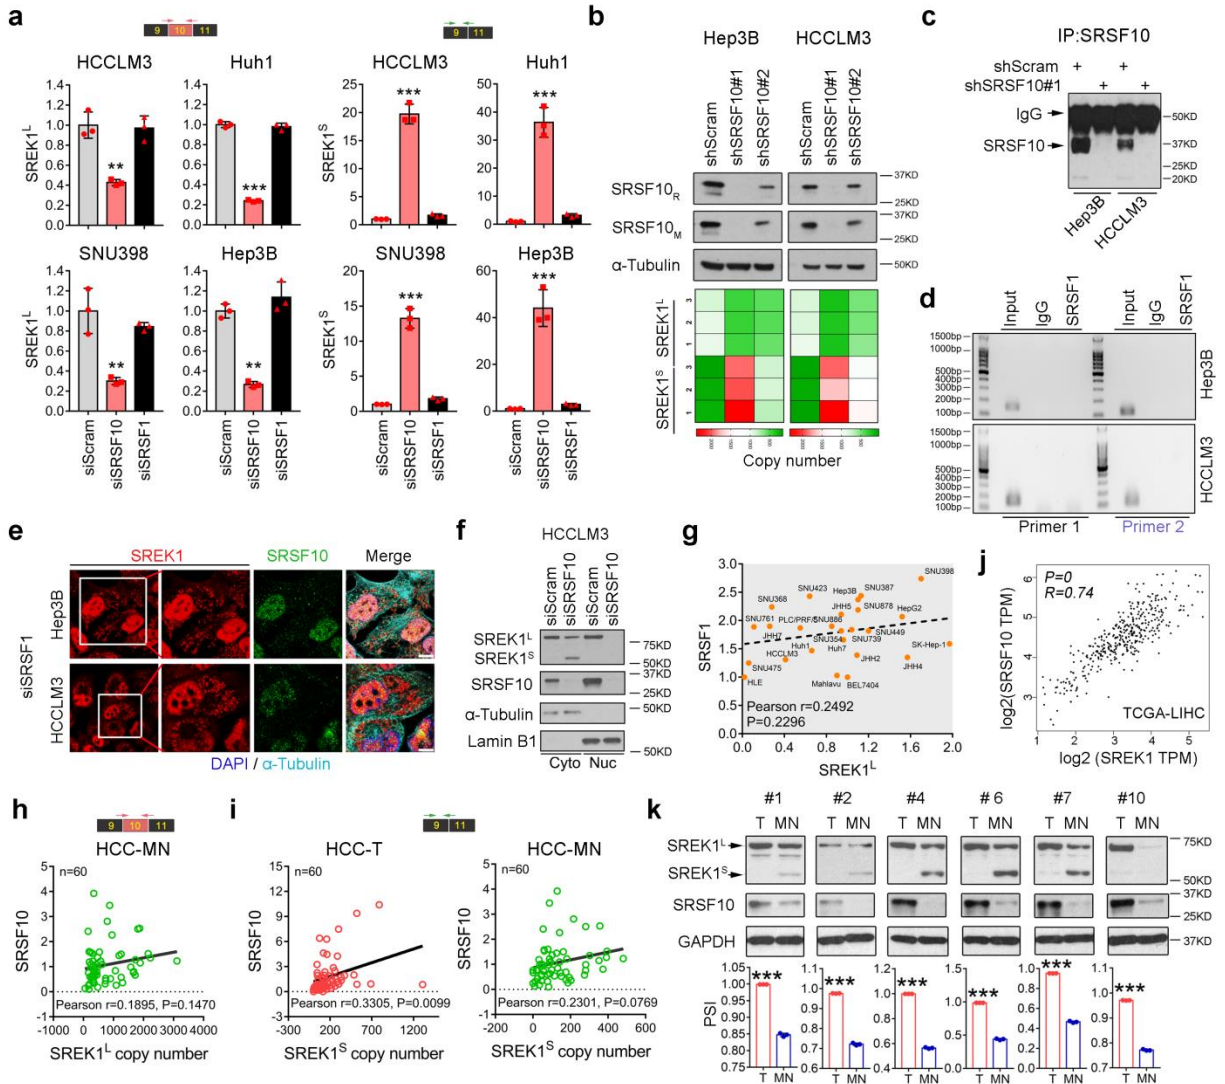

**Supplementary Fig. 5 SRSF10, but not SRSF1, regulates exon10 splicing of SREK1.** (a) Analysis of the relative mRNA expression of SREK1<sup>L</sup> or SREK1<sup>S</sup> after knockdown of scramble, SRSF10 or SRSF1 in four HCC cell lines by real-time PCR assay ( $n=3$ , data are shown as the mean  $\pm$  SD; \*\*p < 0.01, \*\*\*p < 0.001). (b) Western blot (upper panel) and heatmap showing the efficiency of mRNA expression (lower panel), with data shown as copy numbers, following stable SRSF10 knockdown in Hep3B and HCCLM3 cells. (c) Immunoprecipitation of endogenous SRSF10 in stable shSRSF10#1- or shScram-transfected Hep3B and HCCLM3 cells using a commercially available antibody against SRSF10. (d) DNA gel detection of SREK1<sup>L</sup> binding in the RIP by SRSF1 or IgG in Hep3B or HCCLM3 cells. (e) The immunofluorescence confocal

microscopy analysis of the endogenous SREK1 (red), SRSF10 (green) and  $\alpha$ -Tubulin (fake color) in SRSF1-knockdown Hep3B and HCCLM3 cells, scale bar = 5  $\mu$ m. (f) Nuclear and cytoplasmic extraction to detect two SREK1 variants protein expression after SRSF10 or scramble control knockdown in HCCLM3 cells, cyto: Cytoplasm, Nuc: nucleus. (g) Correlation analysis of the expression of SREK1<sup>L</sup> with SRSF1 protein expression in 25 HCC cell lines. *Pearson* correlation analysis of the expression of SRSF10 with (h) SREK1<sup>L</sup> in 60 HCC match normal (HCC-MN), (i) SREK1<sup>S</sup> in 60 HCC-T or HCC-MN tissues, or (j) SREK1<sup>L</sup> in TCGA-LIHC database. (k) Immunoblotting analysis of SREK1<sup>L</sup>, SREK1<sup>S</sup> and SRSF10 protein expression in six pair HCC tissues, and the PSI (Percentage-splice-in = splice\_in / (splice\_in+splice\_out)) was calculated based on the quantification of two variants ( $n=3$ , data are shown as the mean  $\pm$  SD; \*\*\* $p < 0.001$ ). Two-tailed, unpaired  $t$  test is used for (a, k). Source data are provided as a Source Data file.

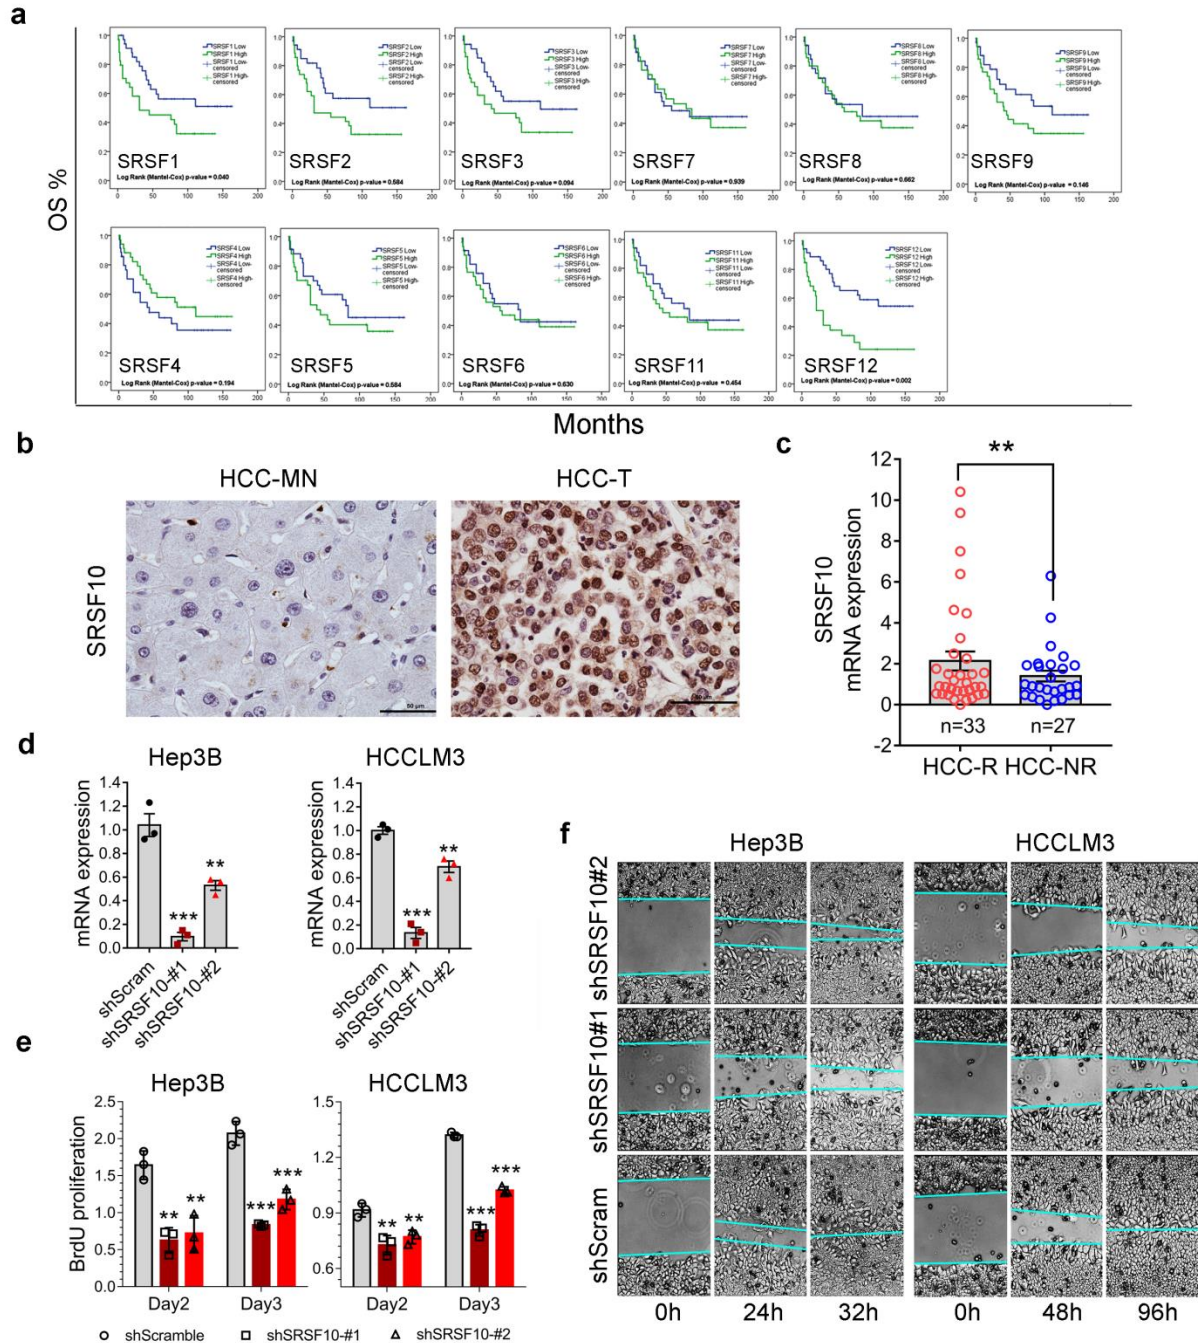

**Supplementary Fig. 6 SRSF10 is associated with the prognosis of HCC patients, and acts as an oncogenic driver in HCC.** (a) Comparison of the OS of the high and low expression (using medium as the cut-off) of the rest 11 SRSF factors based on our microarray dataset information. (b) Representative IHC images of SRSF10 expression in matched normal (MN) and tumor (T) HCC tissues. (c) SRSF10 gene

expression significantly correlated with the recurrence of the HCC patients based on the analysis of 60 pairs of HCC tissues cohort by real time PCR assays (data are shown as the mean  $\pm$  SD; \*\*p <0.01). HCC-R: HCC recurrence; HCC-NR: HCC non-recurrence. **(d)** Real time PCR analysis of the expression of stable knockdown of SRSF10 or scramble in Hep3B and HCCLM3 cells ( $n=3$ , data are shown as the mean  $\pm$  SD; \*\*p <0.01, \*\*\*p <0.001). **(e)** BrdU proliferation ( $n=3$ , data are shown as the mean  $\pm$  SD; \*\*p <0.01, \*\*\*p <0.001) and **(f)** the wound healing assays of the stable knockdown of SRSF10 or scramble in Hep3B and HCCLM3 cells. Two-tailed, unpaired  $t$  test is used for **(c, d, e)**. Source data are provided as a Source Data file.

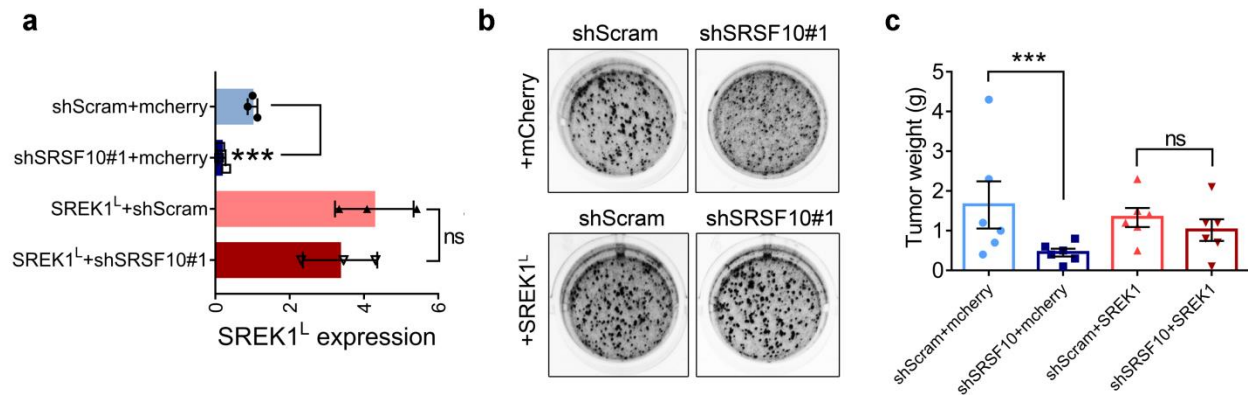

**Supplementary Fig. 7 SREK1<sup>L</sup> is an oncogenic downstream effector of SRSF10 to promote the carcinogenesis of HCC cells.** (a) SREK1<sup>L</sup> expression in various stable HCCLM3 cells as indicated ( $n=3$ , data are shown as the mean  $\pm$  SD; \*\*\* $p < 0.001$ ). (b) Anchorage-independent soft agar colony formation assays of stable knockdown of SRSF10 or the combination of the forced expression of SREK1<sup>L</sup> in HCCLM3 cells. (c) The xenograft tumor weight obtained following injection with the various stable HCCLM3 cells in mouse xenograft tumorigenesis experiments ( $n=6$ , data are shown as the mean  $\pm$  SEM; \*\*\* $p < 0.001$ ). Two-tailed, unpaired  $t$  test is used for (a, c). Source data are provided as a Source Data file.
